# Supplementary material for: Comparative Genomics and Evolutionary Analysis of RNA-Binding Proteins of the CsrA Family in the Genus Pseudomonas
Source: Front Mol Biosci. 2020 Jul 10;7:127. doi: 10.3389/fmolb.2020.00127 (PMC7366521; doi:10.3389/fmolb.2020.00127)
Supplement: Supplementary Table 2 — Number of proteins of each Rsm subfamily detected in the Pseudomonas genome database. The dataset was generated using the Pseudomonas orthologous groups (POGs) from the Pseudomonas genome database (Winsor et al., 2016). Non annotated Rsm paralogues within the POGs were identified by interrogating all available Pseudomonas genomes with BLASTP using the amino acid sequence of RsmA from Pseudomonas aeruginosa (PA0905) as query (Expect value cut-off = 1). [file Table_2.XLSX]

## Sheet: Hoja1
Supplementary Table 2. Number of proteins of each Rsm subfamily detected in the Pseudomonas genome database.
POG	Rsm family*	#proteins
POG000872	RsmA	141
POG008415	RsmN	17
POG013795	RsmM	6
POG015439	RsmI	65
POG016526	RsmE	104
POG017643	RsmC	26
POG018507	RsmD	5
	RsmH	16
	RsmL	7
	not assigned	8
POG: Pseudomonas ortholog group (www.pseudomonas.com)
* See Figure 6
